1 **Genome-wide CRISPR-dCas9 screens in *E. coli* identify essential**  
2 **genes and phage host factors**

3 François Rousset<sup>1,2,†</sup>, Lun Cui<sup>1,†</sup>, Elise Siouve<sup>1</sup>, Florence Depardieu<sup>1</sup> & David Bikard<sup>1,\*</sup>

4 <sup>1</sup> Synthetic Biology Group, Microbiology Department, Institut Pasteur, Paris, 75015, France

5 <sup>2</sup> Sorbonne Université, Collège Doctoral, F-75005 Paris, France

6 \* To whom correspondence should be addressed. Tel: +33140613924; Email:

7 david.bikard@pasteur.fr

8 † François Rousset and Lun Cui contributed equally to this work.

9

10

11 **Running title:** Genome-wide CRISPR-dCas9 screens in *E. coli*

12 **Keywords:** CRISPR-dCas9, *Escherichia coli*, genome-wide screen, phage host factors, CRISPRi

## 13 **Abstract**

14 **High-throughput genetic screens are powerful methods to identify genes linked to a given**  
15 **phenotype. The catalytic null mutant of the Cas9 RNA-guided nuclease (dCas9) can be conveniently**  
16 **used to silence genes of interest in a method also known as CRISPRi. Here, we report a genome-wide**  
17 **CRISPR-dCas9 screen using a pool of ~ 92,000 sgRNAs which target random positions in the**  
18 **chromosome of *E. coli*. We first investigate the utility of this method for the prediction of essential**  
19 **genes and various unusual features in the genome of *E. coli*. We then apply the screen to discover *E.***  
20 ***coli* genes required by phages  $\lambda$ , T4 and 186 to kill their host. In particular, we show that colanic acid**  
21 **capsule is a barrier to all three phages. Finally, cloning the library on a plasmid that can be packaged**  
22 **by  $\lambda$  enables to identify genes required for the formation of functional  $\lambda$  capsids. This study**  
23 **demonstrates the usefulness and convenience of pooled genome-wide CRISPR-dCas9 screens in**  
24 **bacteria in order to identify genes linked to a given phenotype.**

## 25 **Introduction**

26 The technological applications of RNA-guided nucleases derived from the Clustered Regularly  
27 Interspaced Short Palindromic Repeat (CRISPR) prokaryotic immune system (Brouns et al. 2008;  
28 Barrangou et al. 2007; Garneau et al. 2010) represents a true paradigm shift in our ability to manipulate  
29 cells at the genetic level (Barrangou and Doudna 2016). In particular, the Cas9 nuclease from type II  
30 systems can be guided by a chimeric single-guide RNA (sgRNA) which directs it to specifically cleave  
31 target sequences (Jinek et al. 2012). The ease with which these tools can be reprogrammed enables  
32 the development of powerful high-throughput screens. Recent studies have shown how an engineered  
33 CRISPR system packaged in lentiviral vectors can be used to deliver libraries of guide RNAs to human  
34 cells and create libraries of gene knockouts (Shalem et al. 2014; Wang et al. 2014). Such libraries can  
35 target most genes in the genome and were used, among other things, to identify essential genes in the  
36 human genome (Wang et al. 2015; Bertomeu et al. 2018; Evers et al. 2016; Morgens et al. 2016; Hart

37 et al. 2015) and genetic requirements for different human viruses (Ma et al. 2015; Zhang et al. 2016;  
38 Park et al. 2017).

39 This approach is not directly applicable to bacteria where Cas9 cleavage leads to cell death  
40 rather than gene knockout (Bikard et al. 2014; Gooma et al. 2014; Cui and Bikard 2016; Bikard et al.  
41 2012; Citorik et al. 2014). The catalytic dead variant of Cas9, known as dCas9, binds specific targets  
42 without introducing a double-strand break and can conveniently be used to silence genes in bacteria  
43 (Bikard et al. 2013; Qi et al. 2013). Arrayed libraries of a few hundreds of guide RNAs have already  
44 proven useful to decipher the function of essential genes in *Bacillus subtilis* and *Streptococcus*  
45 *pneumoniae* (Peters et al. 2016; Liu et al. 2017). While arrayed libraries enable to access many  
46 phenotypes and easily link them to genotypes, they are cumbersome to work with and maintain.  
47 Pooled screens present the major advantage of enabling the study of much larger libraries at a low  
48 cost and with easy techniques.

49 We recently constructed a pooled library of ~ 92,000 sgRNAs targeting random positions in the  
50 genome of *E. coli* MG1655 with the unique requirement of a proper NGG protospacer adjacent motif  
51 (PAM) (Cui et al. 2018). This library enabled to investigate the properties of CRISPR-dCas9 screens in *E.*  
52 *coli* in an unbiased way. It corroborated the observations made in previous studies that dCas9 can  
53 silence gene expression following two different mechanisms: it can block transcription initiation when  
54 binding the promoter region or block transcription elongation when binding within a gene (Qi et al.  
55 2013; Bikard et al. 2013). The strand orientation of dCas9 binding does not seem to matter when  
56 blocking transcription initiation; however binding of the guide RNA to the coding strand is required to  
57 block the running RNA polymerase. An important feature to consider when performing CRISPR-dCas9  
58 assays is that targeting a gene in an operon will also block the expression of all downstream genes.  
59 This screen also uncovered unexpected sgRNA design rules. In particular dCas9 appears to be toxic in  
60 *E. coli* when guided by sgRNAs sharing some specific 5 nt PAM-proximal sequences. This “bad seed”  
61 effect is particularly pronounced at high dCas9 concentrations and can be alleviated by tuning dCas9  
62 levels while maintaining strong on-target repression. Finally, this screen uncovered how 9 nt of identity

63 between the PAM-proximal region of a guide and an off-target position in an essential or near-essential  
64 gene can be sufficient to block its expression and cause a strong fitness defect. In this study, we now  
65 analyze the results of the screen taking all these design rules into account to investigate what it can  
66 teach us about gene essentiality in *E. coli* during growth in rich medium. We show that this method  
67 can be used to confidently predict gene essentiality in most cases despite the polar effect produced by  
68 dCas9. Among other findings, we further reveal the importance of some repeated elements, identify  
69 essential genes that cannot tolerate small reductions in their expression levels, and challenge the  
70 essentiality of a few genes.

71 As a proof of concept of the usefulness of this approach, we then applied the screen to identify  
72 *E. coli* genes required for bacteriophage infection. The study of phage-host interactions has led to the  
73 development of powerful tools in genetics and molecular biology (Henry and Debarbieux 2012). Their  
74 study can also prove useful to understand how bacteria can mutate to become resistant, and provide  
75 insight for the design of improved phage therapies. In addition to approaches based on reverse  
76 genetics, genome-wide screens have been performed to identify host dependencies of *E. coli* phages  
77 T7 and  $\lambda$  using the Keio collection, an in-frame single-gene knockout strain collection (Maynard et al.  
78 2010; Qimron et al. 2006; Baba et al. 2006). These approaches show several limitations, including the  
79 time-consuming development of such strain collections, the laborious screening process and the focus  
80 on nonessential genes only. Applied to phages  $\lambda$ , T4 and 186, our screen revealed various host factors  
81 including phage receptors and lipopolysaccharide (LPS) requirements. It also highlighted capsule  
82 synthesis as a shared resistance mechanism to the three phages. We finally took advantage of the  
83 ability of phage  $\lambda$  to package plasmids carrying a *cos* site to perform a pooled transduction assay of the  
84 library, enabling to distinguish host genes used by phage  $\lambda$  to lyse its host from host genes required for  
85 the production of functional  $\lambda$  particles.

86

## 87 **Results**

### 88 **Screen design**

89           In our previous work, we constructed strain LC-E75 carrying dCas9 on its chromosome under  
90 the control of an aTc-inducible promoter (Cui et al. 2018). The expression of dCas9 in this strain was  
91 fine-tuned to limit the bad seed effect while maintaining strong on-target repression. The sgRNA library  
92 was introduced into strain LC-E75 and cells were grown over 17 generations in rich medium with dCas9  
93 induction (Fig. 1A). During this experiment, guides that reduce the cell fitness, for instance by blocking  
94 the expression of essential genes, are depleted from the library. The sgRNA library was extracted and  
95 sequenced before and after dCas9 induction. We used the number of reads as a measure of the  
96 abundance of each guide in the library and computed the log<sub>2</sub>-transformed fold change (log<sub>2</sub>FC) as a  
97 measure of fitness.

### 98 **Effect of guides targeting multiple positions**

99           While most guides in our screen target unique positions in the genome, our library also  
100 includes guides targeting duplicated regions. These guides can be conveniently used to investigate the  
101 role of regions or genes present in several copies in the genome, which cannot be easily achieved by  
102 other methods. Interestingly, out of 1990 sgRNAs with multiple targets around the genome, 369 are  
103 strongly depleted (log<sub>2</sub>FC < -2). Most of these depleted guides target genes involved in translation:  
104 ribosomal RNAs, tRNAs, and the elongation factor Tu encoded by highly similar *tufA* and *tufB* genes  
105 (Supplemental Fig. S1). More surprisingly, 39 of these guides target Repetitive Extragenic Palindromic  
106 (REP) elements. Some REP elements were reported to play a regulatory role at the translational level  
107 by modulating mRNA stability (Liang et al. 2015), but their exact role remains elusive. For many of  
108 these guides, none of the target positions are in the vicinity of essential genes, suggesting that the  
109 fitness defect caused by dCas9 binding at REP sequences is not simply due to an effect on the  
110 expression of essential genes. Guides targeting several repeat regions at the same time induced a  
111 significantly stronger fitness defect than guides targeting only one repeat region. Further work will be

112 required to understand the mechanism responsible for the fitness defect produced by REP-targeting  
113 guides, which will likely reveal interesting biology.

#### 114 **Identification of essential genes**

115 Starting from the initial library of ~ 92,000 sgRNAs targeting random positions along the  
116 chromosome of *E. coli*, we filtered sgRNAs with either a bad seed effect, an off-target, multiple targets  
117 in the genome or a low number of reads (see Methods), yielding a library of ~ 59,000 guides used to  
118 perform the analyses below (Supplemental Table 2). To investigate the usefulness of such CRISPR-  
119 dCas9 screens to identify essential genes, we first ranked genes according to the median log<sub>2</sub>FC of  
120 sgRNAs targeting the coding strand (Supplemental Table 5). Mapping our data to the genome of *E. coli*  
121 highlighted a good concordance with previously known essential genomic regions (Fig. 1B). As  
122 expected, genes with the most depleted sgRNAs included a large majority of genes annotated as  
123 essential in the EcoGene database (Zhou and Rudd 2012) (Fig. 1C). Indeed, the median log<sub>2</sub>FC value  
124 was a very good predictor of gene essentiality (Fig. 1D). Overall, a gene network analysis of the 100  
125 top-scoring genes highlighted the main essential functions, namely ribosome assembly, peptidoglycan  
126 synthesis, DNA replication and transcription, fatty acid metabolism and tRNA metabolism  
127 (Supplemental Fig. S2).

128 Candidate essential genes were selected when the median log<sub>2</sub>FC of sgRNAs targeting their  
129 coding strand was lower than -2. This threshold selected 391 genes, including 231 genes annotated as  
130 essential (Fig. 1E). Among the 160 remaining genes, 54 are known to show a slow-growth phenotype  
131 when mutated or deleted and can thus be termed as near-essential. The effect of 58/160 genes can be  
132 explained by a polar effect leading to the repression of a downstream essential or near-essential gene  
133 in the same operon, such as *yejL* and *ypaB* (Fig. 2B). All in all, polar effects account for a false-positive  
134 discovery rate of essential genes of 14.8%. Another 10/160 genes are tRNA genes whose targeting  
135 leads to the silencing of several tRNAs in the same operon or are known to induce a fitness defect. In  
136 addition, 3/160 genes, *rnIB*, *hipB* and *ratA* are part of toxin/antitoxin systems. *rnIB* is expected to be  
137 essential (Koga et al. 2011), although it is not annotated as such in available databases for unknown

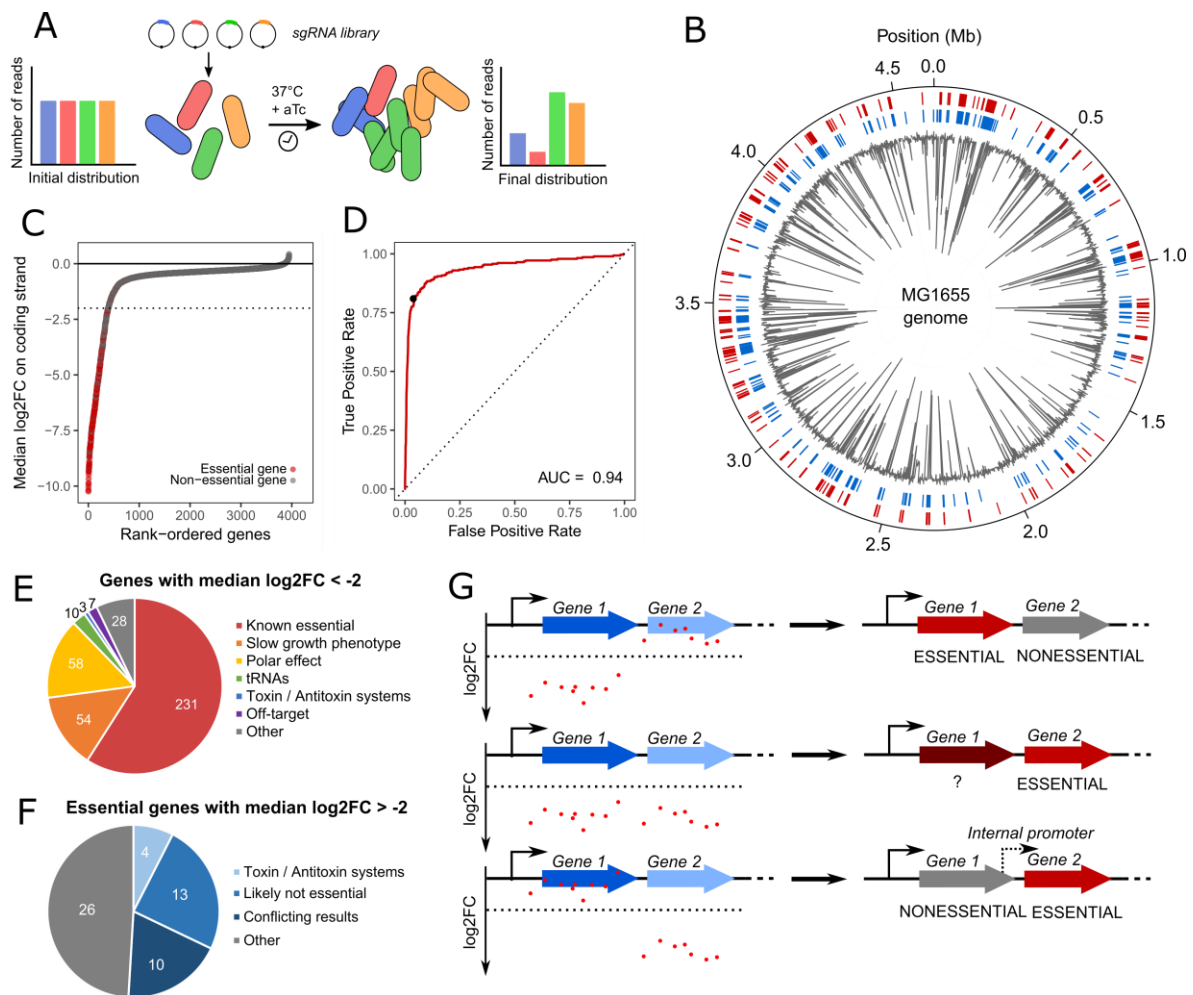

**Figure 1.** Predicting *E. coli* essential genes from the CRISPR-dCas9 screen data. (A) A sgRNA library was transformed into cells expressing dCas9 under the control of an aTc-inducible promoter. The distribution of sgRNAs was retrieved by deep sequencing before dCas9 induction and after 17 generations of induction. (B) Genome-wide visualization of the screen results. The median log<sub>2</sub>FC of sgRNAs targeting the coding strand of genes is displayed in grey. The outer red track represents genes annotated as essential in the EcoGene database while blue track shows genes selected as candidate essential in our screen (median log<sub>2</sub>FC < -2) (C) Genes were ranked according to the median log<sub>2</sub>FC of the sgRNAs targeting the coding strand. Genes annotated as essential in the EcoGene database are shown in red. Dashed line represents the chosen essentiality threshold (median log<sub>2</sub>FC = -2). (D) The median log<sub>2</sub>FC of sgRNAs targeting the coding strand was used to predict gene essentiality. Receiver Operating Characteristic (ROC) curve of the prediction model is plotted (AUC = 0.94). The black dot represents the chosen threshold. (E) 391 candidate essential genes were chosen with the threshold. Polar effect indicates genes located upstream essential or near-essential genes. Slow-growth phenotype indicates non-essential genes known to have a growth defect when mutated or deleted. (F) 53 genes annotated as essential were not classified as essential in our screen. Genes found essential only in the Keio collection but not by other sources are termed as “likely not essential”. Conflicting results indicates genes with discrepancies between various datasets. (G) Within an operon, different scenarios are displayed as well as their corresponding conclusion.

139 reasons. Blocking the expression of *hipB* will also silence the downstream *hipA* toxin. This is expected  
140 to be toxic as degradation of HipB by the Lon protease will free HipA (Hansen et al. 2012). The antitoxin  
141 of *ratA* was not described and its regulation is poorly understood but we can make the hypothesis that  
142 guides targeting this gene also block the expression of the antitoxin. Among the 35 remaining genes,  
143 28 remain ambiguous either because they are targeted by a very low number of sgRNAs in our library  
144 or because these genes may be essential or near-essential in our experimental conditions. Note that 5  
145 of these genes (*aceF*, *lpd*, *dcd*, *hemE* and *ihfA*) were found to be essential in a recent Transposon-  
146 Directed Insertion-site Sequencing (TraDIS) screen (Goodall et al. 2018). Finally, 7 genes can be  
147 explained by off-target effects. When filtering the data to eliminate guides with off-targets, we made  
148 a compromise between the number of guides to keep in the analysis and the stringency of the filter.  
149 As a result, a few guides with off-target effects remain in the library. Since the median log<sub>2</sub>FC was used  
150 to assess gene essentiality, a gene targeted by only one or two guides might be classified as essential  
151 if one of the guides has an off-target. Two such examples are given in Supplemental Fig. S3.

152 In many cases, several genes with a fitness defect are adjacent within an operon. In this  
153 scenario, only the last gene with a fitness defect can confidently be classified as essential or near-  
154 essential due to polar effects. Upstream genes might or might not cause a fitness defect when silenced  
155 alone, and can be classified as potentially essential (Fig. 1G). When doing the analysis in this manner  
156 rather than gene by gene, a fitness defect can be confidently attributed to only 154 genes while 230  
157 genes remain uncertain.

158 Another interesting scenario when looking at operons is when silencing a gene upstream of an  
159 essential or near-essential gene induces no fitness defect despite the theoretical polar effect. A likely  
160 explanation is that an unidentified promoter internal to the operon drives the expression of the  
161 essential gene independently of the upstream gene (Fig. 1G). We identified 7 such cases (Supplemental  
162 Fig. S4), and in all instances recent data supports the existence of an internal promoter (Thomason et  
163 al. 2015).



164           Conversely, some genes annotated as essential do not show a fitness defect in our screen  
165 (median log<sub>2</sub>FC > -2) (Fig. 1F, Supplemental Table 5). Out of 53 essential genes that we fail to identify,  
166 4 genes (*chpS*, *mazE*, *yafN* and *yefM*) are part of toxin-antitoxin systems which are encoded in operons  
167 with the antitoxin gene preceding the toxin gene. By definition, an antitoxin is essential to the cell as  
168 silencing it leads the cognate toxin to kill the cell. In the four cases above, dCas9 blocks the expression  
169 of both the antitoxin and the toxin gene, which we expected to be toxic if the antitoxin is more labile.  
170 Surprisingly, unlike *hipB*, no effect on fitness was measured here. Another 13/53 genes annotated as  
171 essential in the Ecogene database were also supposed to be non-essential by other studies (Gerdes et  
172 al. 2003; Yamazaki et al. 2008; Goodall et al. 2018). We successfully replaced three of these genes,  
173 *alsK*, *bcsB* and *entD* by a kanamycin resistance cassette, confirming that they are indeed not essential  
174 (Supplemental Fig. S5). In 10/53 other cases, gene essentiality has also been challenged by conflicting  
175 results (Baba et al. 2006; Yamamoto et al. 2009; Goodall et al. 2018; Gerdes et al. 2003; Yamazaki et  
176 al. 2008). For the remaining 26 genes, the absence of fitness defect could be explained by an inefficient  
177 repression by dCas9, a strong robustness of the cell to low levels of the protein or could indicate genes  
178 that are actually not essential in our experimental conditions. In addition, weak repression could arise  
179 from negative regulatory feedback loops. Binding of dCas9 to genes under such control would induce  
180 an increased transcription initiation rate, ultimately leading to a weak silencing (Vigouroux et al. 2018).

### 181 **Unexpected effects on the template strand of target genes**

182           We further investigated the effect of sgRNAs targeting the template strand of genes. Guides in  
183 this orientation should only have a moderate effect on gene expression. As expected, the vast majority  
184 of them do not produce any fitness defect (Cui et al. 2018). We compared the median log<sub>2</sub>FC of sgRNAs  
185 targeting the coding strand and the template strand (Fig. 2A). Interestingly, we observed that a set of  
186 essential genes produced a strong fitness defect regardless of the targeted strand (including *accA*, *alaS*,  
187 *ftsA*, *ftsQ*, *glyQ*, *glyS*, *lolB*, *lptC*, *rplX*, *rpmB*, *rpsL* and *yefM*). The cell thus seems very sensitive to the  
188 expression level of these genes. Two nonessential genes, *yejL* and *ypaB*, also show a strong fitness  
189 defect with guides in both orientations, but which can in this case be explained by polar effects (Fig.

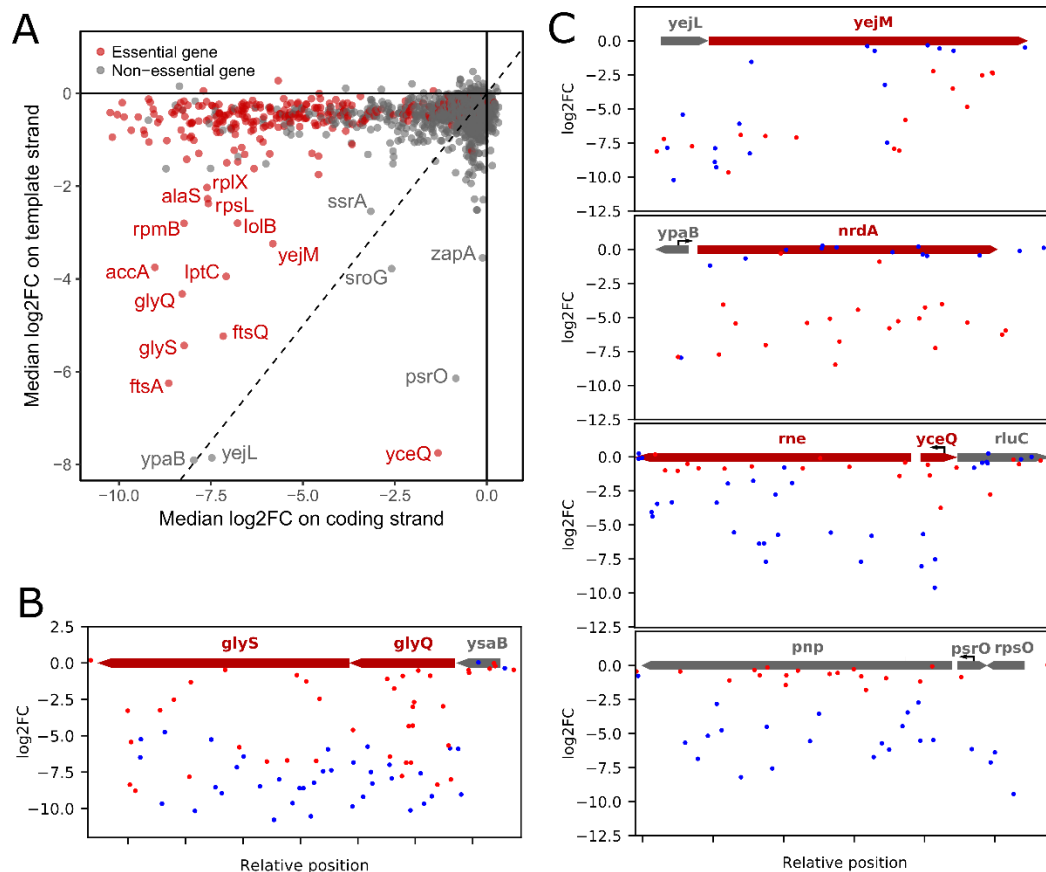

**Figure 2.** Unexpected effects highlight unusual operon architecture. (A) Comparison between median log2FoldChange of sgRNAs targeting the coding strand or the template strand highlights unexpected effects. (B) Representation of sgRNAs targeting *glyQ* and *glyS* where targeting the template strand is sufficient to induce a fitness defect. (C) Representation of sgRNAs targeting *yejL*, *ypaB*, *yceQ* or *psrO*. (B,C) sgRNAs targeting the positive or negative strand are dotted in red or blue respectively. Black arrows indicate known promoters.

190 2B): *yejL* is located upstream of the essential gene *yejM*, and *ypaB* contains the promoter of the  
 191 essential gene *nrdA*, whose expression is likely blocked by guides targeting *ypaB* in either orientations.

192 Unexpectedly, a few genes show a fitness defect when targeted on the template strand but  
 193 not on the coding strand (Fig. 2A). These effects can also be explained by polar effects on nearby  
 194 essential genes and shed light on atypical gene organizations. For instance, the *sroG* gene is actually a  
 195 riboswitch controlling the expression of the essential gene *ribB* involved in riboflavin synthesis. One  
 196 sgRNA binding to the template strand in the very beginning of the gene was strongly depleted,  
 197 suggesting that it blocks transcription initiation of the *ribB* mRNA. *yceQ* is a small open reading frame  
 198 of just 321bp in the promoter region of the essential RNase E gene (*rne*) and in the opposite

199 orientation. Guide RNAs directing dCas9 to bind the template strand of *yceQ* are thus in the good  
200 orientation to effectively block the expression of *rne* (Fig. 2B). The *rne* mRNA has indeed been  
201 described as having a long 5' untranslated region antisens to *yceQ* which carries hairpins involved in  
202 post-transcriptional regulation (Jain and Belasco 1995). This suggests that *yceQ* is actually not essential,  
203 which is also supported by recent TraDIS data (Goodall et al. 2018). A similar case is that of *psrO* which  
204 encodes a small RNA and located in the promoter region of *pnp*. Binding of dCas9 to the template  
205 strand of *psrO* likely blocks transcription of *pnp* (Fig. 2B).

206 Overall, these results show the performance of CRISPRi screens to assess gene essentiality in  
207 *E. coli* but also to highlight diverse genomic organizations.

208

## 209 **Identification of genes providing phage resistance when silenced**

210 To demonstrate the broad usefulness of this strategy to the study of different phenotypes, we  
211 applied the method to unveil bacterial genes required for successful phage infection, also known as  
212 host factors. Considering previous results, we now focused on sgRNAs targeting genes on the coding  
213 strand of genes only, yielding a library of ~ 22,000 sgRNAs. As a proof of concept, we used temperate  
214 phage  $\lambda$  whose host requirements are well documented. We also used temperate phage 186clts (a  
215 thermosensitive strain of phage 186) and virulent phage T4 in order to compare their host  
216 requirements. As strain LC-E75 carries the *dcas9* expression cassette integrated in the *attB* site of  
217 phage 186, we constructed a new strain, FR-E01, with the same cassette integrated in the *attB* site of  
218 phage HK022 in order to avoid any interference with phage 186. Both strains expressed dCas9 at the  
219 same level (Supplemental Fig. S6).

220 A culture of strain FR-E01 carrying the library was grown with aTc to stationary phase allowing  
221 for dCas9 to be expressed and for the target gene products to be diluted and/or degraded. Cells were  
222 then diluted 100-fold and grown to exponential phase, still with aTc, followed by infection with phage  
223  $\lambda$ , T4 or 186clts at a MOI of 1 (Fig. 3A). During the experiment, phages lyse bacteria unless the sgRNA

224 they carry makes the cell resistant to infection. The pool of sgRNAs was sequenced before and after 2  
225 h of infection and a log<sub>2</sub>FC value was computed for each sgRNA as previously (Supplemental Table 3  
226 and Fig. 3B). For each gene, a resistance score was calculated as the median log<sub>2</sub>FC of the sgRNAs  
227 targeting the coding strand (Supplemental Table 6). As expected, the highest-scoring genes correspond  
228 to phage receptors and their positive regulators (Fig. 3B-C). The phage  $\lambda$  receptor *lamB* (maltose outer  
229 membrane porin) (Randall-Hazelbauer and Schwartz 1973) and its regulators *malT* and *cyaA*  
230 respectively ranked 2<sup>nd</sup>, 1<sup>st</sup> and 6<sup>th</sup> after infection by  $\lambda$  phage. The 3<sup>rd</sup> place was occupied by gene *malk*  
231 which is expressed upstream of *lamB* in an operon structure. Guides that block the expression of this  
232 gene therefore also block the expression of *lamB*, explaining its high ranking although it is not known  
233 to participate in the infection process. Phage T4 can either use the outer membrane porin OmpC as a  
234 receptor or the core-lipid A region of the LPS that includes the heptose region (Yu and Mizushima  
235 1982). Gene *ompC* and its regulator *ompR* respectively ranked 1<sup>st</sup> and 2<sup>nd</sup> after T4 infection, while  
236 genes *rfaD* and *waaF* respectively involved in the synthesis of glycerol-D-manno-heptose and its  
237 addition to the LPS, ranked 5<sup>th</sup> and 8<sup>th</sup>. Considering that the receptor for phage 186 is not clearly  
238 established, we used this approach to identify candidate host components. Genes with the highest  
239 resistance scores to 186 did not include any surface protein but did include *waa* genes involved in the  
240 LPS synthesis pathway (Fig. 3C). Some of them, including *rfaD-waaF*, were also found to affect phage  
241  $\lambda$  infection in our screen and are known to be associated with lower levels of LamB (Randall 1975), but  
242 the LPS requirement was stronger for phage 186. To validate this observation, we performed infection  
243 time courses with a strain deleted for *waaJ*, one of the last genes in the LPS biosynthesis pathway, in  
244 the presence of each of the three phages. The absence of gene *waaJ* induced a strong resistance to  
245 186 but not to  $\lambda$  and T4 (Fig. 3D) suggesting that the outer core of the K-12 strain LPS is required for  
246 adhesion of phage 186. Taken together, these observations validate the ability of our method to  
247 identify phage receptors which are the most common bacterial components giving rise to phage  
248 resistance.

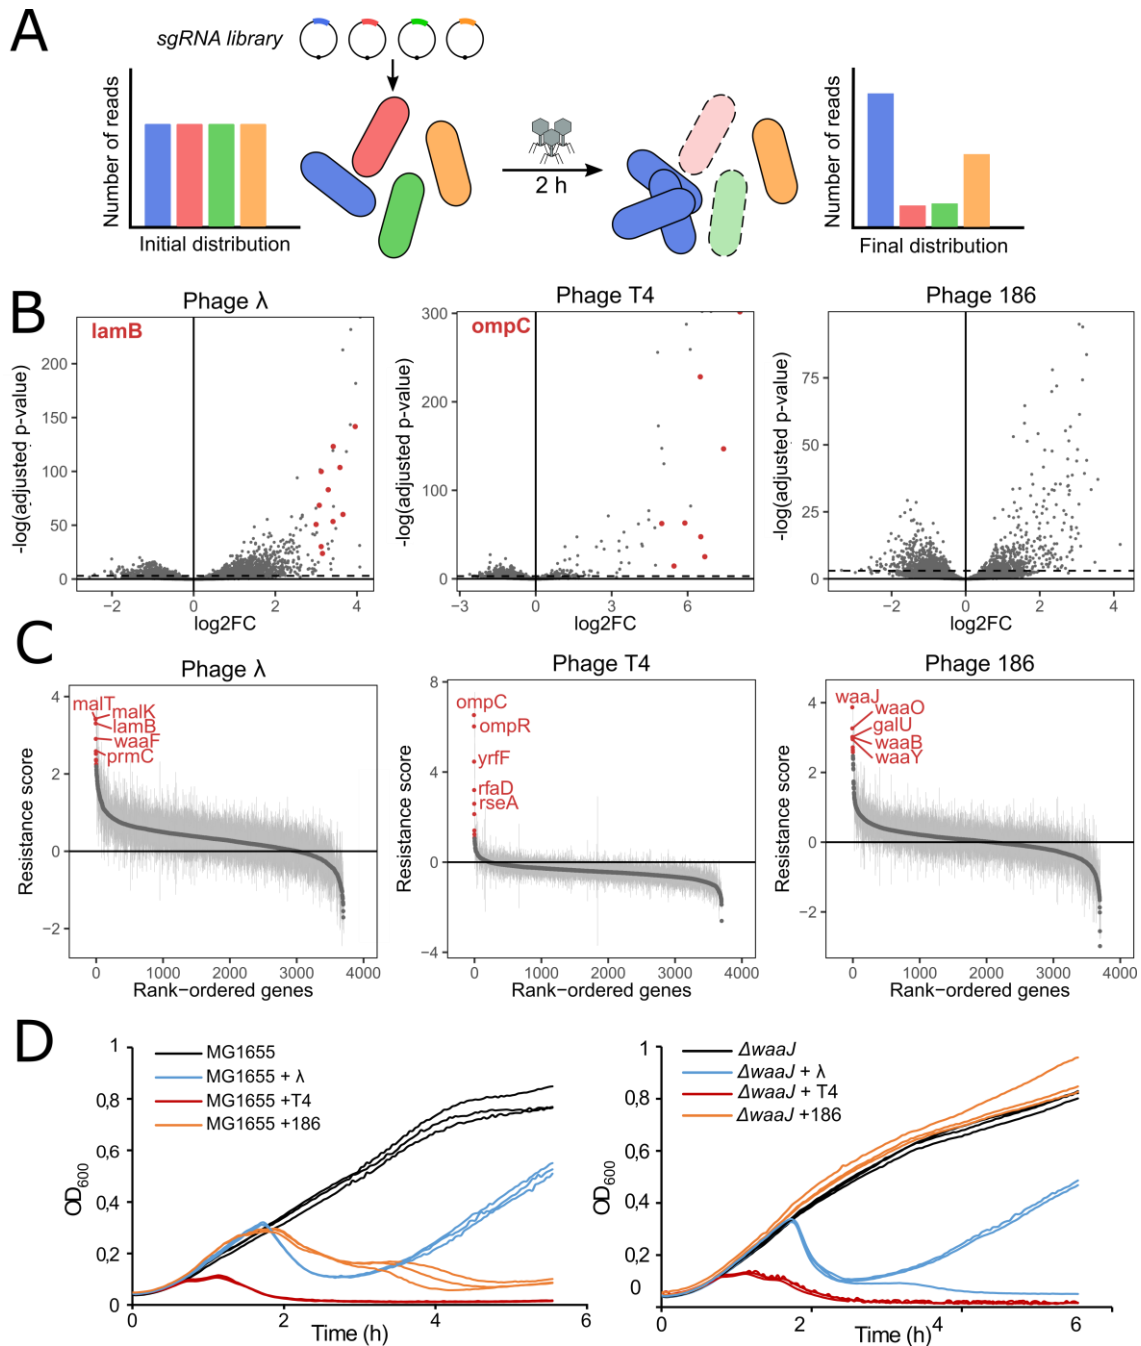

**Figure 3.** The CRISPRi screen reveals phage receptors and LPS requirements of phages λ, T4 and 186. (A) Overview of the experimental procedure. dCas9 expression was induced for ~ 8h before infection by λ, T4 or 186 at a MOI of 1. The distribution of sgRNA was retrieved before and after infection by sequencing. (B) The log<sub>2</sub>FoldChange was computed for each sgRNA. For phages λ and T4, sgRNAs targeting the phage receptor (respectively LamB and OmpC) are highlighted in red. Dashed line represents adjusted p-value = 10<sup>-3</sup>. (C) For each gene, a resistance score was calculated as the median log<sub>2</sub>FoldChange of sgRNAs targeting the coding strand. 5 top-scoring genes are highlighted in red in each panel. (D) Infection time courses of MG1655 (top panel) or Keio collection strain  $\Delta waaJ$  without phage or after infection by λ, T4 or 186 (MOI ~ 0.01).

249 Further comparison between phages  $\lambda$ , T4 and 186 revealed closer host requirements between  
250 the two temperate phages,  $\lambda$  and 186, than between  $\lambda$  and T4 or between 186 and T4 (Fig. 4A). We  
251 selected genes with a resistance score of at least 20% of the maximum score for each phage (Fig. 4B).  
252 This threshold selected only 5 genes for phage T4 while it selected 367 genes for phage  $\lambda$  and 88 for  
253 phage 186, suggesting that T4 relies on very few host components. Genes selected after  $\lambda$  infection  
254 included the *rnpA* and *rnt* RNAses as well as genes involved in two tRNA modification pathways: uridine  
255 2-thiolation (*tusA*, *tusBCD*, *tusE* and *mnmA*) and the essential N<sup>6</sup>-threonylcarbamoyladenosine  
256 modification (*tsaB*, *tsaC*, *tsaD* and *tsaE*). Note that uridine 2-thiolation has been previously described  
257 to be necessary for the proper translation of  $\lambda$  proteins gpG and gpGT involved in tail assembly through  
258 its impact on programmed ribosomal slippage (Maynard et al. 2010, 2012). We can hypothesize that  
259 the essential N<sup>6</sup>-threonylcarbamoyladenosine modification of tRNAs is also necessary for the proper  
260 translation of  $\lambda$  proteins. Interestingly, genes required for both  $\lambda$  and 186 infection included *prmC*  
261 involved in translation termination, genes *dnaKJ* known to be required for DNA replication of  $\lambda$   
262 (Yochem et al. 1978), as well as lysogenization regulator *hfID*. During  $\lambda$  infection, HfID facilitates  
263 degradation of repressor CII, thus avoiding lysogeny (Kihara et al. 2001). This result suggests that HfID  
264 could also regulate lysogeny in phage 186.

265 Three genes with a high resistance score to all 3 phages were identified (Fig. 4B): *rfaD* and  
266 *waaF* discussed above for their involvement in LPS synthesis, and *yrfF*, an essential gene indirectly  
267 linked to capsule synthesis. Yrff inhibits the Rcs signaling pathway by an unknown mechanism (Clarke  
268 2010). This signaling pathway senses and responds to damage to the membrane or to the  
269 peptidoglycan by activating genes involved in colanic acid capsule synthesis (Gottesman and Stout  
270 1991; Stout 1994), suggesting that *yrfF* silencing induces capsule synthesis. Since this gene is essential,  
271 it cannot be deleted or repressed by a fully matched sgRNA without killing the cell. We thus reduced  
272 its expression to intermediate levels using a sgRNA bearing 4 mismatches at the 5'-end (*yrfF*-4m)  
273 (Bikard et al. 2013; Vigouroux et al. 2018). The resulting strain only showed a slight growth defect and

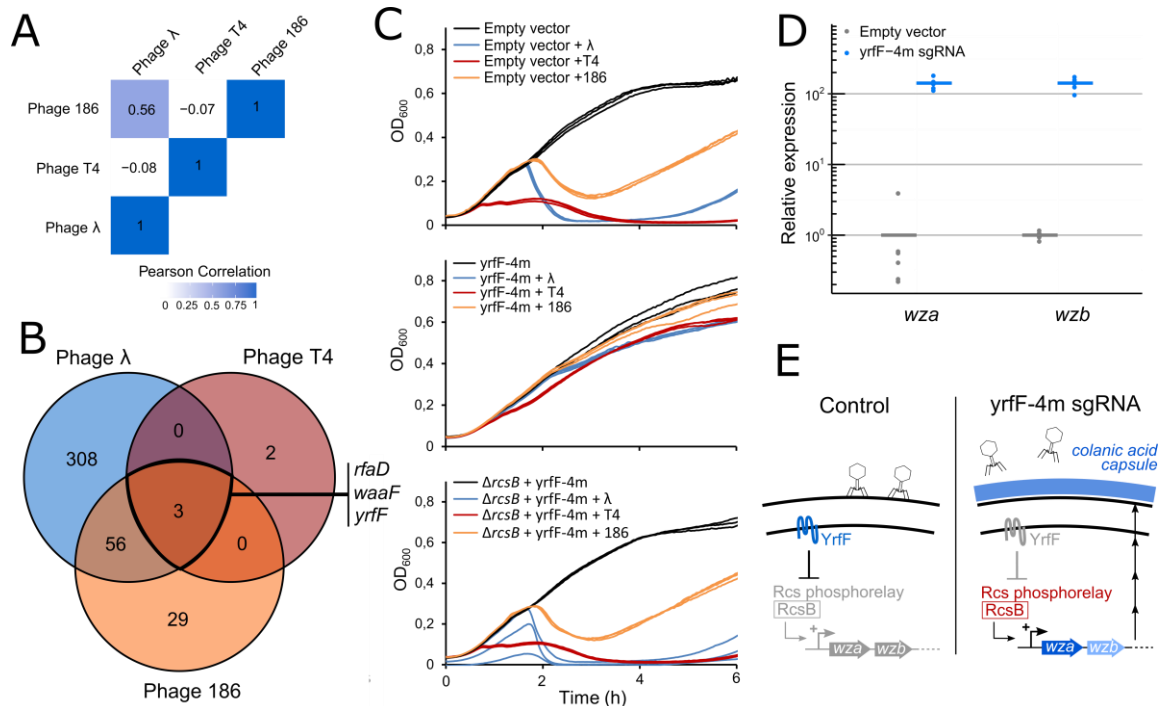

**Figure 4.** Colanic acid capsule synthesis is a common resistance mechanism to phages λ, T4 and 186. (A) Pearson correlation coefficient of resistance scores between phages λ, T4 and 186-cl. (B) For each phage, genes with a resistance score greater than 20% of the maximum score were selected and compared in a Venn diagram. (C) Infection time courses of FR-E01 carrying an empty vector, FR-E01 expressing *yrff* sgRNA with 4 mismatches (*yrff*-4m) or FR-E01Δ*rcsB* expressing *yrff*-4m without infection or after infection by λ, T4 or 186-cl (MOI ~ 0.01). Experiments were performed in triplicates. (D) Expression of genes *wza* and *wzb* involved in colanic acid capsule synthesis in strain FR-E01 carrying an empty vector or expressing *yrff*-4m sgRNA, as measured by RT-qPCR. Results are shown for 3 biological replicates and 2 technical replicates. (E) Schematic of colanic acid capsule-mediated phage resistance. Yrff inhibits the Rcs phosphorelay. Inhibition of Yrff expression activates the Rcs phosphorelay which triggers the expression of genes involved in colanic acid capsule synthesis.

274 became resistant to all three phages (Fig. 4C). Deletion of gene *rcsB*, a central actor of the Rcs pathway,  
 275 restored sensitivity to the 3 phages in this strain, showing that the resistance phenotype that results  
 276 from *yrff* silencing is mediated by the Rcs pathway. We further confirmed this by showing that silencing  
 277 *yrff* induces a ~ 140-fold increase in the expression of the *wza-wzb* operon directly involved in colanic  
 278 acid capsule synthesis (Fig. 4D-E). Interestingly, deletion of *rfaD* or *waaF* (but not other genes of the  
 279 LPS biosynthesis pathway) was shown to induce a mucoid phenotype through the synthesis of a  
 280 capsule (Joloba et al. 2004). This suggest that they might provide resistance to all three phages through  
 281 this pathway rather than through their role in LPS synthesis. Consistently with this hypothesis, silencing  
 282 genes upstream of *rfaD* and *waaF* in the LPS biosynthesis pathway did not provide resistance to T4 in  
 283 our screen.

## 284 Identification of genes involved in later steps of $\lambda$ infection

285 The screen performed here is thus a powerful method to identify genes required by phages to  
286 kill the cell. However, this first strategy cannot identify genes necessary for the synthesis of functional  
287 phage capsids if blocking the expression of these genes does not prevent the phage from killing the  
288 bacteria. One can expect that this will be the case of any host gene involved in late stages of the  
289 infectious cycle when the host cell is already doomed. In order to get better insights into the genes  
290 affecting the production of functional phages, we implemented a second step focusing on phage  $\lambda$  (Fig.  
291 5A). The vector carrying the sgRNA library was designed to carry a  $\lambda$  packaging site (*cos* site), thus  
292 forming a cosmid (Cronan 2013). Upon infection, phage  $\lambda$  is thus able to package the plasmid carrying  
293 the guide RNA only if a functional capsid was produced (Supplemental Fig. S7). After infection by phage  
294  $\lambda$ , the cell lysate containing a mixture of  $\lambda$  and cosmid particles was used to transduce strain MG1655:: $\lambda$   
295 and thus recover guides in the library that do not affect the infection process. The distribution of  
296 sgRNAs recovered after transduction was compared to the initial pool to identify depleted sgRNAs  
297 corresponding to bacterial genes required for the production of functional capsids (Supplemental  
298 Table 4). Interestingly, 45 depleted guides in our library have a perfect match in the  $\lambda$  phage genome,  
299 mostly in the late operon (Supplemental Fig. S8). These guides were not found to block cell lysis in our  
300 first screen as they likely act too late in the phage cycle, but are able to limit the number of particle  
301 produced.

302 When comparing our data with the essentiality data from our previous screen, we observed a  
303 strong correlation between the effect of guides on the cell fitness and log<sub>2</sub>FC after transduction (Fig.  
304 5B). One might indeed expect that genes whose repression slows down cell growth will also slow down  
305 phage production, leading to fewer particles being released after 2h of infection. In order to identify  
306 genes which disproportionately affect phage production over cell growth, we performed statistical  
307 analyses taking the effect on growth into account (see Methods, Supplemental Table 7). We identified  
308 57 genes which significantly decrease the amount of transduced particles when repressed (FDR < 0.05)  
309 (Fig. 5C). These genes could be separated into two groups according to their resistance score (Fig. 5D):



310 genes with a positive resistance score provided resistance to lysis when silenced, while genes with a  
311 negative resistance score led to an increased sensitivity to the phage but a reduced production of  
312 functional phage particles. The first group includes genes involved in the expression of LamB (*lamB*,  
313 *malk*, *malt*, *crp*, *cyaA*) as well as other genes identified in the first step, such as *rpoH* and *dnaJ*, *prmC*,  
314 *rnt* and *rnpA*. The second group includes genes that could not be identified in the first step of our  
315 screen based on their resistance score as they decrease or have little effect on cell survival to  $\lambda$   
316 infection. These genes include well-characterized genes involved in the transcription of the  $\lambda$  genome:  
317 RNA polymerase subunits  $\beta$  *rpoB* and  $\beta'$  *rpoC*, RNA polymerase  $\sigma^{70}$  factor *rpoD* and transcription  
318 termination factors *rho*, *nusA* and *nusG* (Li et al. 1992; Gottesman et al. 1980; Friedman 1992; Ghysen  
319 and Pironio 1972). These factors interact with  $\lambda$  protein N to avoid transcription termination at  
320 terminator sites present on its genome, thus allowing the expression of downstream genes in a process  
321 called transcription antitermination (Gottesman et al. 1980). The screen also identified *groL* encoding  
322 the GroEL chaperonin involved in the assembly of the  $\lambda$  head (Sternberg 1973b; Georgopoulos et al.  
323 1973; Sternberg 1973a). Its transcription is controlled by the heat shock-specific RNA polymerase  $\sigma^{32}$   
324 factor *rpoH* found in the first group (Chuang and Blattner 1993). Genes with little effect on survival  
325 after  $\lambda$  infection include DNA polymerase III subunit  $\alpha$  encoded by *dnaE*, as well as many genes  
326 encoding aminoacyl-tRNA synthetases, namely *argS*, *pheS*, *pheT*, *leuS*, *hisS*, *proS*, *trpS*, *valS*, *cysS*, and  
327 *metG*, suggesting that these essential elements are a limiting resource for the production of phage  
328 particles.

329 This analysis highlights the fact that silencing some genes inhibits the formation of phage  
330 particles while leaving the cell susceptible to lysis by the phage. To confirm this observation, infection  
331 time courses and phage titer measurements were performed in strain FR-E01 expressing a sgRNA  
332 targeting *nusG* which has a negative resistance score (Fig. 5E). Infection at a MOI of 1 led to a complete  
333 lysis of the cell population showing that silencing *nusG* does not provide resistance to infection.  
334 However, infection at MOI = 0.01 did not lead to lysis of the population, presumably because the first  
335 infected cells did not release enough active phages to lyse the rest of the population. Measuring phage

336 concentration during infection indeed showed a ~ 10-fold reduction in burst size when *nusG* is silenced  
 337 (Fig. 5F).

338

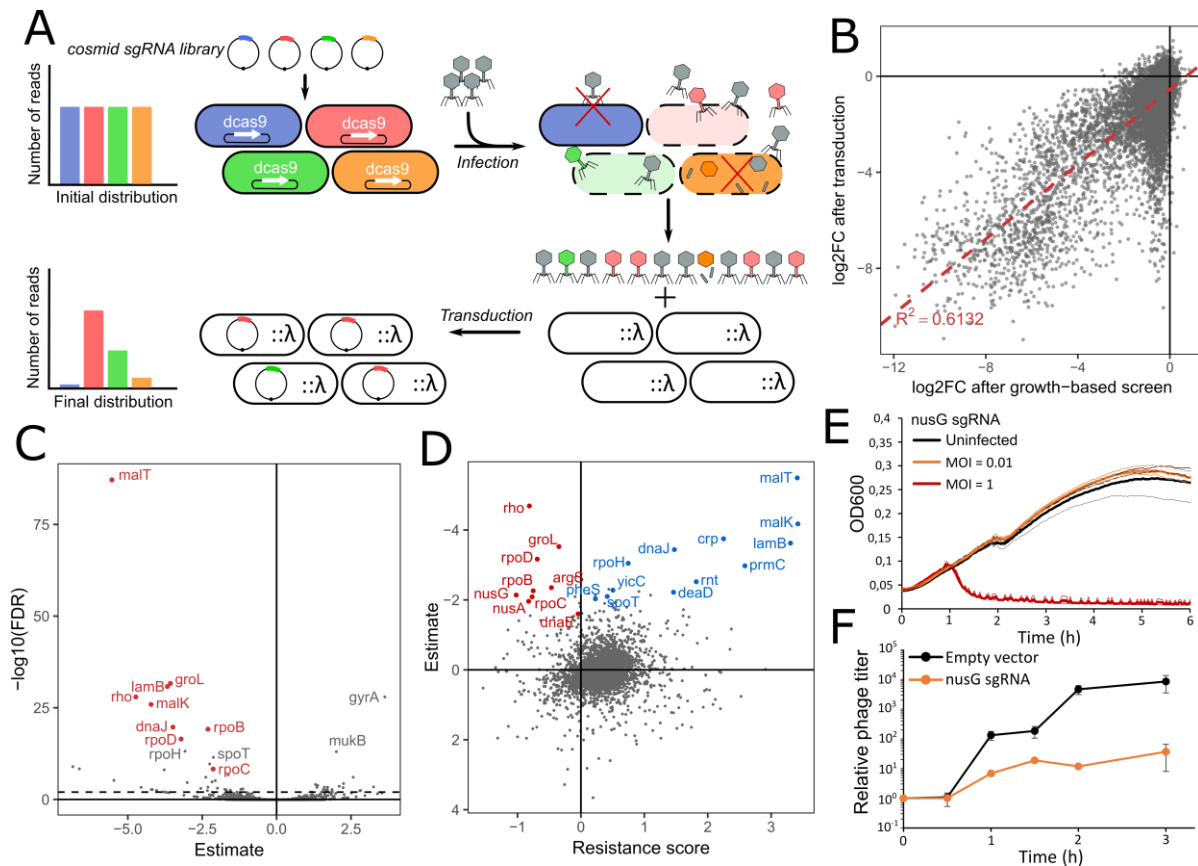

**Figure 5.** Transduction of the library reveals host genes necessary for the production of functional capsids. (A) Overview of the experimental system to screen for  $\lambda$  host factors. Strain FR-E01 expressing dCas9 under aTc-inducible promoter and carrying the sgRNA library on a cosmid was infected by  $\lambda$ . The library can be packaged into capsids when the sgRNA does not disrupt phage propagation. After transduction into a lysogenic strain, the distribution of sgRNAs is measured by sequencing. (B)  $\log_2$ FC values after transduction are strongly correlated to the effect of guides on cell growth (ANOVA,  $F = 27263$ ,  $df = 17198$ ,  $p < 10^{-16}$ ). (C) For each gene, a generalized linear model was built to explain  $\log_2$ FoldChange after transduction while taking the effect on cell growth into account. Estimate and corrected p-value (FDR) are shown for each gene. Genes previously described as host factors are shown in red. (D) Comparison of results after infection and after transduction. Genes that significantly decrease the production of functional phages ( $\text{FDR} < 0.001$ ) are highlighted in red or blue when they show a negative or positive resistance score respectively. (E) Growth of strain FR-E01 carrying a sgRNA targeting *nusG* without infection or after infection by  $\lambda$  at MOI = 0.01 or MOI = 1. (F) Phage titer during infection of strain FR-E01 carrying an empty vector or expressing a sgRNA targeting *nusG* (MOI = 0.01). Error bars show standard deviation of three independent experiments.

339

## 340 Discussion

341 This work establishes a proof of concept of the performance of genome-wide CRISPRi screens  
342 in bacteria for the identification of essential genes and phage host factors. When series of genes in  
343 operons are found to have an effect, it is theoretically only possible to conclude that the last gene in  
344 the series is essential. A gene by gene analysis of our data was nonetheless able to reliably predict gene  
345 essentiality with a false positive discovery rate due to polar effects of only 14.8%. This surprisingly good  
346 performance is due to the fact that essential genes tend to cluster in the same operons. Yet, this is not  
347 always the case and polar effects represent a limitation of what can be done with CRISPRi screens: one  
348 can easily identify operons of interest but a detailed understanding of the involvement of each gene  
349 requires further investigation with other techniques. Another limitation of CRISPRi is the heterogeneity  
350 in sgRNA repression efficiency. Efforts have been made in Eukaryotic systems to predict sgRNA activity  
351 (Kim et al. 2018; Chuai et al. 2017; Doench et al. 2016; Chari et al. 2017; Labuhn et al. 2018) but such  
352 models remain to be developed in bacteria in order to improve the quality of pooled CRISPR-dCas9  
353 screens.

354 It is interesting to discuss the advantages and drawbacks of CRISPR-dCas9 screens in  
355 comparison with other genome-wide approaches. Arrayed collections of gene deletions have also  
356 proven extremely useful for the study of the few bacterial species where they have been constructed.  
357 The most commonly used is the *E. coli* Keio collection (Baba et al. 2006; Yamamoto et al. 2009) which  
358 is used as a reference for the classification of *E. coli* genes as essential, and which has been used in  
359 many different types of screens, including for the identification of phage host factors (Maynard et al.  
360 2010; Qimron et al. 2006). However, the development of such strain collections and the screening  
361 process are laborious and focused on nonessential genes only. The Keio collection is also known to  
362 contain a few errors arising from the failure to obtain some gene knockouts for other reasons than  
363 gene essentiality, or from the fact that some genes were duplicated during the construction of the  
364 collection (Yamamoto et al. 2009). Transposon-based strategies such as Tn-seq are commonly  
365 employed in bacteria. With these approaches, false negatives may arise when the insertion of the

366 transposon does not disrupt the functionality of the protein, or when only a small region of a gene is  
367 essential. False positives might also arise from biases in the number of transposon insertions along the  
368 genome. Consequently, recent results highlighted the need to combine statistical analysis with manual  
369 curation in transposon-based screens (Goodall et al. 2018). Finally, both methods can cause polar  
370 effects on the expression of adjacent genes which can be hard to predict as opposed to the predictable  
371 effects of dCas9 binding on the expression of downstream genes.

372 Overall, CRISPRi screens present several key advantages: (i) The expression of dCas9 is  
373 inducible, which enables to maintain guides targeting essential genes in the library, allowing their  
374 study; (ii) Duplicated regions can easily be studied since sgRNAs can be designed to target identical  
375 sequences present in several copies along the genome; (iii) Intermediate repression levels can be  
376 obtained either by targeting the template strand of genes or by using sgRNAs with a variable number  
377 of mismatches (Vigouroux et al. 2018; Bikard et al. 2013); (iv) libraries can be rationally designed to  
378 target specific locations or subsets of genes, as opposed to the random insertion of transposons. (v)  
379 Library sequencing is straightforward compared to the tedious process of extracting transposon  
380 junctions from genomic DNA.

381 In this study, we used these key advantages to investigate essential genes and other interesting  
382 features of the *E. coli* genome. Overall, 81.3 % (231/284) of the genes previously annotated as essential  
383 and covered in our study were correctly identified as essential. A large part of the genes that we failed  
384 to identify might not actually be essential. Indeed, our screen showed some discrepancies with  
385 annotated databases, particularly with the Keio collection. We experimentally confirmed that some  
386 genes were wrongly annotated as essential, corroborating other recent work (Goodall et al. 2018).  
387 Nonetheless, our screen failed to identify a few well-known essential genes. This might be due to weak  
388 dCas9 repression, strong robustness of the cell to low protein levels or negative feedback loops. Note  
389 also that the design of the library being random, some genes only have a small number of guides,  
390 reducing the likelihood to correctly identify them. This will easily be corrected in future screens by a  
391 rational library design.

392 In addition to the simple investigation of gene essentiality, our results highlighted the  
393 importance of REP elements and the usefulness of CRISPRi to investigate such repeated loci. Targeting  
394 the template strand of genes further enabled us to identify essential genes which cannot tolerate small  
395 reductions of their expression level. Proteins encoded by these genes could be promising antibiotic  
396 targets as a partial inhibition of their activity is likely lethal. Our screen also highlighted some atypical  
397 genomic organizations such as internal promoters within operons or nonessential genes antisense to  
398 neighboring essential genes.

399 Once constructed, a guide RNA library can be conveniently used to screen other phenotypes  
400 of interest. We thus applied the method to identify *E. coli* genes required for phages to kill their host.  
401 Among the host factors identified, phage receptors and other genes involved in phage adhesion had  
402 the strongest effect. Interestingly, some host factors were common between  $\lambda$  and 186 suggesting  
403 some similarities between their infectious cycles. Phage T4 relied on fewer host genes than  $\lambda$  and 186,  
404 which is consistent with the fact that T4 carries most of the components required for its replication  
405 (Miller et al. 2003). Accordingly, *E. coli* was only reported to become resistant to phage T4 by acquiring  
406 mutations that block its adsorption (Lenski 1988), whereas *E. coli* can also become resistant to  $\lambda$  by  
407 acquiring mutations in intracellular components (Friedman 1992). Our cosmid-based transduction  
408 assay enabled a more in-depth study of  $\lambda$  infection and identified genes which did not provide phage  
409 resistance when silenced. Note that our screen failed to identify a few previously described host factors  
410 for  $\lambda$  infection (Maynard et al. 2010), likely for the same reasons that we failed to identify a few  
411 essential genes.

412 A notable result of our screen is the identification of colanic acid capsule synthesis as a shared  
413 resistance mechanism to phages  $\lambda$ , 186 and T4. The capsule of *E. coli* has been shown to protect against  
414 external aggressions such as antibiotics or desiccation and help to evade the host immune system  
415 (Rendueles et al. 2017). While previous studies have reported that bacterial capsule can also provide  
416 resistance to several phages (Kim et al. 2015; Scholl et al. 2005; Paynter and Bungay 1970), this is  
417 rarely seen as the main function of the capsule. Our findings argue for a broader role of colanic acid

418 capsule synthesis as a defense mechanism against a wide range of phages, acting as a physical barrier  
419 by masking phage receptors on the cell surface. Accordingly, some phages have evolved the capacity  
420 to degrade capsule through the action of enzymes such as endosialidases which are frequently carried  
421 by the tail fibers of caudovirales (Bull et al. 2010; Cornelissen et al. 2012; Scholl et al. 2001; Kim et al.  
422 2015).

423 Genome-wide CRISPR screens have already demonstrated their usefulness in Eukaryotic  
424 systems. This study should now set the stage for their broader adoption as a powerful tool in bacterial  
425 genetics.

## 426 **Methods**

### 427 **Bacterial strains and media**

428 *E. coli* strains were grown in Luria-Bertani (LB) broth. LB-Agar 1.5% was used as a solid medium.  
429 Antibiotics were used in standard concentrations (50 µg / mL kanamycin, 100 µg / mL carbenicillin). *E.*  
430 *coli* DH5α was used as a cloning strain and *E. coli* K12 MG1655 was used for screening experiments.

### 431 **Phage strains and stocks**

432 Phages λ and 186cl-ts were propagated from lysogenic *E. coli* strain while T4 was propagated  
433 from liquid stocks. Overnight cultures of MG1655::λ and C600::186clts were harvested and the  
434 supernatant was filtered (0.22 µm). All the liquid stocks were further propagated in MG1655 grown in  
435 LB supplemented with maltose 0.2% and CaCl<sub>2</sub> 5 mM at a multiplicity of infection (MOI) of 1. Phage  
436 titers were measured by spotting 2 µL-drops of 10-fold serial dilutions in λ dilution buffer (TrisHCl 20  
437 mM, NaCl 0.1M and MgSO<sub>4</sub> 10 mM) on a bacterial lawn of *E. coli* MG1655 in LB-agar (0.5%) containing  
438 5 mM CaCl<sub>2</sub>.

### 439 ***E. coli* strain construction**

440 Strain LC-E75 used for the essentiality screen was described in our previous study (Cui et al.  
441 2018). This strain expresses an optimized *dcas9* cassette under the control of a ptet promoter

442 integrated at the phage 186 attB site. In order to study phage 186 with our screen, a new strain FR-  
443 E01 was constructed with the same cassette integrated at the HK022 attB site to avoid any  
444 interference. A high-copy pOSIP backbone (St-Pierre et al. 2013) containing the HK022 integrase,  
445 HK022 attB site and a Kanamycin-resistance cassette was digested by EcoRI and PstI. A fragment  
446 containing *dcas9* gene under the control of an aTc-inducible promoter (ptet) was amplified by PCR with  
447 primers LC124/LC125 to introduce homology regions with the backbone. The 2 fragments were  
448 assembled by the Gibson method (Gibson et al. 2009). The resulting vector was electroporated into  
449 strain MG1655. The backbone containing the HK022 integrase and a Kan<sup>R</sup> selection marker was then  
450 removed using the pE-FLP (Amp<sup>R</sup>) plasmid able to recombine FRT sites flanking the backbone. pE-FLP  
451 was then cured through serial restreaks on LB-Agar, yielding strain FR-E01. Primers used for cloning  
452 are listed in Supplemental Table 1.

#### 453 **CRISPRi library design and assembly**

454 A library of ~ 92,000 sgRNAs was designed previously (Cui et al. 2018). These sgRNAs target 20-  
455 nt regions adjacent to NGG sites in *E. coli* K-12 MG1655 and were chosen randomly among the total  
456 pool of possible sgRNAs in this strain. Briefly, the library was generated through on-chip oligo synthesis  
457 (CustomArray) and assembled into the psgRNACos backbone using the Gibson method (Gibson et al.  
458 2009). The resulting plasmid library DNA was transferred to strains LC-E75 and FR-E01 by  
459 electroporation yielding > 10<sup>8</sup> colonies, thus ensuring a ~1000X coverage of the library. Primers used  
460 for cloning are listed in Supplemental Table 1.

#### 461 **High-throughput screens**

462 Growth-based screen data was obtained from our previous study (Cui et al. 2018). This screen  
463 was performed over 17 generations in triplicates from independent aliquots of the library generated  
464 from 3 independent transformations into strain LC-E75.

465 The phage screen was performed in triplicates as follows: FR-E01 was grown at 37°C from 1 mL  
466 aliquots stored at -80 °C into 500 mL LB. At OD<sub>600</sub> = 0.2, dCas9 expression was induced by addition of 1

467 nM aTc to trigger the silencing of the target genes. The culture was grown to stationary phase ( $OD_{600}$   
468 = 2) and diluted 100-fold in LB containing 1 nM aTc, 0.2 % Maltose and 5 mM  $CaCl_2$ . At  $OD_{600} = 0.4$ , 20  
469 mL of the culture was sampled and the library was extracted by miniprep (Nucleospin Plasmid,  
470 Macherey-Nage) to obtain the sgRNA distribution before infection. The culture was then infected with  
471 1 mL of  $\lambda$ , T4 or 186cl-ts stocks ( $10^7$  pfu /  $\mu$ L) to reach a MOI of 1. After 2 h at 37°C, the cultures were  
472 harvested (7 min – 4,000 g). Pellets were washed twice in PBS and the library was extracted by  
473 miniprep to obtain the sgRNA distribution after infection. For phage  $\lambda$ , the supernatant containing a  
474 mixture of  $\lambda$  and packaged library was collected and filtered (0.22  $\mu$ m). Transduction was performed  
475 with 25 mL of lysate and 75 mL of stationary phase culture of MG1655 carrying  $\lambda$  prophage (providing  
476 resistance to super-infection) grown in LB supplemented with 0.2 % maltose. After 30 min at 37°C, cells  
477 were harvested and resuspended in 1 mL LB and transduced cells were selected on 4 12x12 cm Petri  
478 dishes containing kanamycin. After 4h at 37°C, nascent colonies were washed and harvested in 5 mL  
479 LB-Kan. Each sample was split into 6 minipreps to obtain the final sgRNA distribution.

#### 480 **Illumina sample preparation and sequencing**

481 Library sequencing was performed as described previously (Cui et al. 2018). Briefly, a  
482 customized Illumina sequencing method was designed to avoid problems arising from low library  
483 diversity when sequencing PCR products. Two PCR reactions were used to generate the sequencing  
484 library with primers listed in Supplemental Table 1. The 1st PCR adds the 1st index. The 2nd PCR adds  
485 the 2nd index and flow cells attachment sequences. Sequencing is then performed using primer LC609  
486 as a custom read 1 primer. Custom index primers were also used: LC499 reads index 1 and LC610 reads  
487 index 2. Sequencing was performed on a NextSeq 500 benchtop sequencer. The first 2 cycles which  
488 read bases common to all clusters were set as dark cycles, followed by 20 cycles to read the guide RNA.  
489 Using this strategy, we obtained on average 17 million and 4.6 million reads per experimental sample  
490 for growth-based screen in LC-E75 and for phage screen in FR-E01 respectively.



## 491 **Data analysis**

492 Samples were retrieved from pooled sequencing data according to the corresponding pairs of  
493 indexes. For essentiality analysis, guides were filtered for potential off-target effect by discarding  
494 guides whose 9 PAM-proximal bases have a perfect match next to an NGG PAM in the promoter region  
495 of a gene, or when the 11 PAM-proximal bases have a perfect match next to an NGG PAM allowing  
496 binding to the coding strand of a gene. Guides were also filtered to remove the 10 strongest bad seeds  
497 (AGGAA, TAGGA, ACCCA, TTGGA, TATAG, GAGGC, AAAGG, GGGAT, TAGAC and GTCCT) described in  
498 our previous study (Cui et al. 2018). Guides with less than 20 reads in total were discarded. Statistical  
499 analysis was performed from count data using the DESeq2 package (Love et al. 2014) in R. This package  
500 allows comparison of expression data using negative binomial generalized linear models. Read counts  
501 were normalized to a non-targeting control guide RNA present in the library. A paired analysis was  
502 performed to compare each sample to its initial condition. The log<sub>2</sub>FoldChange (log<sub>2</sub>FC) value  
503 represents the enrichment or depletion of each sgRNA. For the phage screen, guides targeting the  
504 template strand of genes or outside of genes were excluded from the analysis, yielding a library of ~  
505 22,000 sgRNAs. The lists of all sgRNAs with computed log<sub>2</sub>FC values after the growth-based screen,  
506 after phage screens and after transduction assay are provided as Supplemental Tables 2, 3 and 4  
507 respectively. For each gene, the median log<sub>2</sub>FC value of the sgRNAs targeting the coding strand was  
508 used for ranking (Supplemental Tables 5 and 6). For the  $\lambda$  transduction experiment, a linear model was  
509 built to predict log<sub>2</sub>FC as a function of the log<sub>2</sub>FC values obtained from the growth-based screen and  
510 a Boolean parameter considering or not the gene as a host factor. A given gene was regarded as a hit  
511 when the Boolean parameter significantly improved the model after correction for multiple testing  
512 (FDR < 0.05). Genes whose silencing decreases the production of functional capsids have a negative  
513 estimate after transduction. A list of estimates and FDR for each gene is provided as Supplemental  
514 Table 7.

## 515 **Infection dynamics**

516 sgRNAs were cloned into a psgRNAcos backbone through Golden Gate assembly using BsaI  
517 (Engler et al. 2008) and were electroporated into strain FR-E01. For essential gene *yrfF*, 4 mismatches  
518 were inserted at the 5'-end of the sgRNA to decrease expression of the target gene to intermediate  
519 levels. Constructions were validated by Sanger sequencing. The list of individual sgRNAs is provided in  
520 Supplemental Table 8. Strains were grown overnight and diluted 100-fold in LB medium containing  
521 0.2% maltose, 1 nM aTc, 5 mM CaCl<sub>2</sub> and kanamycin. At OD<sub>600</sub> = 0.4, 90 μL of cultures were mixed in  
522 96-well plates with 100 μL of fresh medium and 10 μL of a 8.10<sup>4</sup> pfu/μL stock of the appropriate phage  
523 (MOI ~ 0.01). Infection dynamics were monitored in three replicates on an Infinite M200Pro (Tecan) at  
524 37°C with shaking for 8h. Strain *ΔwaaJ* was obtained from the Keio collection and infection dynamics  
525 were performed identically.

## 526 **Gene deletions**

527 Plasmid pKOBEG-A carrying the λ-red system components under the control of an arabinose-  
528 inducible promoter was transformed into strain MG1655. A kanamycin resistance cassette was  
529 amplified from plasmid pKD4 with primers introducing homology regions with sequences flanking  
530 genes *alsK*, *bcsB* or *entD*. Electrocompetent MG1655-pKOBEG-A cells were prepared with arabinose  
531 before transformation of the DNA fragments (1 μg). Recovery and overnight incubation were  
532 performed at 30°C with arabinose and kanamycin. The next day, colonies were restreaked and  
533 incubated at 37°C. Primers used for pKD4 amplification and colony screening are provided in  
534 Supplemental Table 1.

## 535 **RT-qPCR**

536 Overnight cultures were diluted 1:100 in 3 mL LB containing 1nM aTc. Cells were further grown  
537 for 2h before RNA extraction using Direct-zol™ RNA MiniPrep (Zymo Research) followed by DNase  
538 treatment using TURBO DNA-free Kit (Thermo Fisher Scientific). All RNAs were reverse transcribed into  
539 cDNA using the Transcriptor First Strand cDNA Synthesis Kit using 500 ng RNA (Roche). qPCR was

540 performed with the FastStart Essential DNA Probes master mix (Roche) in a LightCycler 96 (Roche)  
541 following the manufacturer's instructions. qPCR was performed in two technical replicates and three  
542 biological replicates. Relative gene expression was computed on LightCycler 96 software (Roche) using  
543 the  $\Delta\Delta Cq$  method (Schmittgen and Livak 2008) after normalization by 5S rRNA (*rrsA*). Primers are listed  
544 in Supplemental Table 9.

545

## 546 **Data Access**

547 The screen results are provided as Supplemental Tables 2-4. Other relevant data supporting the  
548 findings of the study are available in this article and its Supplemental Information files, or from the  
549 corresponding author upon request.

## 550 **Acknowledgements**

551 We thank Alicia Calvo-Villamañán and Olaya Rendueles-Garcia for helpful advice as well as Antoine  
552 Decrulle for providing phage 186clts. This work was supported by the European Research Council (ERC)  
553 under the Europe Union's Horizon 2020 research and innovation program (grant agreement No  
554 [677823]), by the French Government's Investissement d'Avenir program and by Laboratoire  
555 d'Excellence 'Integrative Biology of Emerging Infectious Diseases' (ANR-10-LABX-62-IBEID); F.R. is  
556 supported by a doctoral scholarship from Ecole Normale Supérieure.

## 557 **Disclosure declaration**

558 The authors declare no competing financial interests.

## 559 **References**

560 Baba T, Ara T, Hasegawa M, Takai Y, Okumura Y, Baba M, Datsenko KA, Tomita M, Wanner BL, Mori  
561 H, et al. 2006. Construction of Escherichia coli K-12 in-frame, single-gene knockout mutants: the  
562 Keio collection. *Mol Syst Biol* **2**: 2006.0008.  
563 Barrangou R, Doudna JA. 2016. Applications of CRISPR technologies in research and beyond. *Nat*  
564 *Biotechnol* **34**: 933–941.

- 565 Barrangou R, Fremaux C, Deveau H, Richards M, Boyaval P, Moineau S, Romero DA, Horvath P. 2007.  
566 CRISPR Provides Acquired Resistance Against Viruses in Prokaryotes. *Science (80- )* **315**: 1709–  
567 1712.
- 568 Bertomeu T, Coulombe-Huntington J, Chatr-Aryamontri A, Bourdages KG, Coyaud E, Raught B, Xia Y,  
569 Tyers M. 2018. A High-Resolution Genome-Wide CRISPR/Cas9 Viability Screen Reveals  
570 Structural Features and Contextual Diversity of the Human Cell-Essential Proteome. *Mol Cell*  
571 *Biol* **38**: e00302-17.
- 572 Bikard D, Euler CW, Jiang W, Nussenzweig PM, Goldberg GW, Duportet X, Fischetti VA, Marraffini LA.  
573 2014. Exploiting CRISPR-Cas nucleases to produce sequence-specific antimicrobials. *Nat*  
574 *Biotechnol* **32**: 1146–50.
- 575 Bikard D, Hatoum-Aslan A, Mucida D, Marraffini LA. 2012. CRISPR Interference Can Prevent Natural  
576 Transformation and Virulence Acquisition during In Vivo Bacterial Infection. *Cell Host Microbe*  
577 **12**: 177–186.
- 578 Bikard D, Jiang W, Samai P, Hochschild A, Zhang F, Marraffini LA. 2013. Programmable repression and  
579 activation of bacterial gene expression using an engineered CRISPR-Cas system. *Nucleic Acids*  
580 *Res* **41**: 7429–7437.
- 581 Brouns SJJ, Jore MM, Lundgren M, Westra ER, Slijkhuys RJH, Snijders APL, Dickman MJ, Makarova KS,  
582 Koonin E V., van der Oost J. 2008. Small CRISPR RNAs Guide Antiviral Defense in Prokaryotes.  
583 *Science (80- )* **321**: 960–964.
- 584 Bull JJ, Vimr ER, Molineux IJ. 2010. A tale of tails: Sialidase is key to success in a model of phage  
585 therapy against K1-capsulated Escherichia coli. *Virology* **398**: 79–86.
- 586 Chari R, Yeo NC, Chavez A, Church GM. 2017. sgRNA Scorer 2.0: A Species-Independent Model To  
587 Predict CRISPR/Cas9 Activity. *ACS Synth Biol* **6**: 902–904.
- 588 Chuai G, Wang Q-L, Liu Q. 2017. In Silico Meets In Vivo: Towards Computational CRISPR-Based sgRNA  
589 Design. *Trends Biotechnol* **35**: 12–21.
- 590 Chuang SE, Blattner FR. 1993. Characterization of twenty-six new heat shock genes of Escherichia  
591 coli. *J Bacteriol* **175**: 5242–52.
- 592 Citorik RJ, Mimee M, Lu TK. 2014. Sequence-specific antimicrobials using efficiently delivered RNA-  
593 guided nucleases. *Nat Biotechnol* **32**: 1141–1145.
- 594 Clarke DJ. 2010. The Rcs phosphorelay: more than just a two-component pathway. *Future Microbiol*  
595 **5**: 1173–84.
- 596 Cornelissen A, Ceysens P-J, Krylov VN, Noben J-P, Volckaert G, Lavigne R. 2012. Identification of EPS-  
597 degrading activity within the tail spikes of the novel Pseudomonas putida phage AF. *Virology*  
598 **434**: 251–256.
- 599 Cronan JE. 2013. Improved plasmid-based system for fully regulated off-to-on gene expression in  
600 Escherichia coli: Application to production of toxic proteins. *Plasmid* **69**: 81–89.
- 601 Cui L, Bikard D. 2016. Consequences of Cas9 cleavage in the chromosome of Escherichia coli. *Nucleic*  
602 *Acids Res* **44**: 4243–4251.
- 603 Cui L, Vigouroux A, Rousset F, Varet A, Khanna V, Bikard D. E. coli CRISPRi screen reveals unexpected  
604 sequence-specific toxicity. *Nat Commun* .: in press.
- 605 Doench JG, Fusi N, Sullender M, Hegde M, Vaimberg EW, Donovan KF, Smith I, Tothova Z, Wilen C,  
606 Orchard R, et al. 2016. Optimized sgRNA design to maximize activity and minimize off-target  
607 effects of CRISPR-Cas9. *Nat Biotechnol* **34**: 1–12.
- 608 Engler C, Kandzia R, Marillonnet S. 2008. A One Pot, One Step, Precision Cloning Method with High  
609 Throughput Capability. *PLoS One* **3**: e3647.
- 610 Evers B, Jastrzebski K, Heijmans JPM, Grønrum W, Beijersbergen RL, Bernards R. 2016. CRISPR  
611 knockout screening outperforms shRNA and CRISPRi in identifying essential genes. *Nat*  
612 *Biotechnol* **34**: 631–633.
- 613 Friedman DI. 1992. Interaction between bacteriophage  $\lambda$  and its Escherichia coli host. *Curr Opin*  
614 *Genet Dev* **2**: 727–738.
- 615 Garneau JE, Dupuis M-È, Villion M, Romero DA, Barrangou R, Boyaval P, Fremaux C, Horvath P,  
616 Magadán AH, Moineau S. 2010. The CRISPR/Cas bacterial immune system cleaves

- 617 bacteriophage and plasmid DNA. *Nature* **468**: 67–71.
- 618 Georgopoulos CP, Hendrix RW, Casjens SR, Kaiser AD. 1973. Host participation in bacteriophage  
619 lambda head assembly. *J Mol Biol* **76**: 45–60.
- 620 Gerdes SY, Scholle MD, Campbell JW, Balázsi G, Ravasz E, Daugherty MD, Somera AL, Kyrpides NC,  
621 Anderson I, Gelfand MS, et al. 2003. Experimental determination and system level analysis of  
622 essential genes in Escherichia coli MG1655. *J Bacteriol* **185**: 5673–84.
- 623 Ghysen A, Pironio M. 1972. Relationship between the N function of bacteriophage  $\lambda$  and host RNA  
624 polymerase. *J Mol Biol* **65**: 259–272.
- 625 Gibson DG, Young L, Chuang R-Y, Venter JC, Hutchison CA, Smith HO. 2009. Enzymatic assembly of  
626 DNA molecules up to several hundred kilobases. *Nat Methods* **6**: 343–345.
- 627 Gomaa AA, Klumpe HE, Luo ML, Selle K, Barrangou R, Beisel CL. 2014. Programmable removal of  
628 bacterial strains by use of genome-targeting CRISPR-Cas systems. *MBio* **5**: e00928-13.
- 629 Goodall ECA, Robinson A, Johnston IG, Jabbari S, Turner KA, Cunningham AF, Lund PA, Cole JA,  
630 Henderson IR. 2018. The Essential Genome of Escherichia coli K-12. *MBio* **9**: e02096-17.
- 631 Gottesman ME, Adhya S, Das A. 1980. Transcription antitermination by bacteriophage lambda N gene  
632 product. *J Mol Biol* **140**: 57–75.
- 633 Gottesman S, Stout V. 1991. Regulation of capsular polysaccharide synthesis in Escherichia coli K12.  
634 *Mol Microbiol* **5**: 1599–1606.
- 635 Hansen S, Vulić M, Min J, Yen T-J, Schumacher MA, Brennan RG, Lewis K. 2012. Regulation of the  
636 Escherichia coli HipBA Toxin-Antitoxin System by Proteolysis ed. V. De Crécy-Lagard. *PLoS One*  
637 **7**: e39185.
- 638 Hart T, Chandrashekar M, Aregger M, Steinhart Z, Brown KR, MacLeod G, Mis M, Zimmermann M,  
639 Fradet-Turcotte A, Sun S, et al. 2015. High-Resolution CRISPR Screens Reveal Fitness Genes and  
640 Genotype-Specific Cancer Liabilities. *Cell* **163**: 1515–1526.
- 641 Henry M, Debarbieux L. 2012. Tools from viruses: Bacteriophage successes and beyond. *Virology* **434**:  
642 151–161.
- 643 Jain C, Belasco JG. 1995. RNase E autoregulates its synthesis by controlling the degradation rate of its  
644 own mRNA in Escherichia coli: unusual sensitivity of the rne transcript to RNase E activity.  
645 *Genes Dev* **9**: 84–96.
- 646 Jinek M, Chylinski K, Fonfara I, Hauer M, Doudna JA, Charpentier E, Wiedenheft B, Sternberg SH,  
647 Doudna JA, Bhaya D, et al. 2012. A programmable dual-RNA-guided DNA endonuclease in  
648 adaptive bacterial immunity. *Science* **337**: 816–21.
- 649 Joloba ML, Clemmer KM, Sledjeski DD, Rather PN. 2004. Activation of the gab operon in an RpoS-  
650 dependent manner by mutations that truncate the inner core of lipopolysaccharide in  
651 Escherichia coli. *J Bacteriol* **186**: 8542–6.
- 652 Kihara A, Akiyama Y, Ito K. 2001. Revisiting the Lysogenization Control of Bacteriophage  $\lambda$ . *J Biol*  
653 *Chem* **276**: 13695–13700.
- 654 Kim HK, Min S, Song M, Jung S, Choi JW, Kim Y, Lee S, Yoon S, Kim H (Henry). 2018. Deep learning  
655 improves prediction of CRISPR–Cpf1 guide RNA activity. *Nat Biotechnol* **36**: 239–241.
- 656 Kim MS, Kim YD, Hong SS, Park K, Ko KS, Myung H. 2015. Phage-encoded colanic acid-degrading  
657 enzyme permits lytic phage infection of a capsule-forming resistant mutant Escherichia coli  
658 strain. *Appl Environ Microbiol* **81**: 900–9.
- 659 Koga M, Otsuka Y, Lemire S, Yonesaki T. 2011. Escherichia coli rnlA and rnlB Compose a Novel Toxin-  
660 Antitoxin System. *Genetics* **187**: 123–130.
- 661 Labuhn M, Adams FF, Ng M, Knoess S, Schambach A, Charpentier EM, Schwarzer A, Mateo JL,  
662 Klusmann J-H, Heckl D. 2018. Refined sgRNA efficacy prediction improves large- and small-scale  
663 CRISPR–Cas9 applications. *Nucleic Acids Res* **46**: 1375–1385.
- 664 Lenski RE. 1988. Experimental studies of pleiotropy and epistasis in Escherichia coli. I. Variation in  
665 competitive fitness among mutants resistant to virus T4. *Evolution (N Y)* **42**: 425–432.
- 666 Li J, Horwitz R, McCracken S, Greenblatt J. 1992. NusG, a new Escherichia coli elongation factor  
667 involved in transcriptional antitermination by the N protein of phage  $\lambda$ . *J Biol Chem* **267**: 6012–  
668 6019.

- 669 Liang W, Rudd KE, Deutscher MP. 2015. A role for REP sequences in regulating translation. *Mol Cell*  
670 **58**: 431–9.
- 671 Liu X, Gallay C, Kjos M, Domenech A, Slager J, van Kessel SP, Knoops K, Sorg RA, Zhang J-R, Veening J-  
672 W. 2017. High-throughput CRISPRi phenotyping identifies new essential genes in *Streptococcus*  
673 *pneumoniae*. *Mol Syst Biol* **13**: 931.
- 674 Love MI, Huber W, Anders S. 2014. Moderated estimation of fold change and dispersion for RNA-seq  
675 data with DESeq2. *Genome Biol* **15**.
- 676 Ma H, Dang Y, Wu Y, Jia G, Anaya E, Zhang J, Abraham S, Choi JG, Shi G, Qi L, et al. 2015. A CRISPR-  
677 based screen identifies genes essential for west-nile-virus-induced cell death. *Cell Rep* **12**: 673–  
678 683.
- 679 Maynard ND, Birch EW, Sanghvi JC, Chen L, Gutschow M V., Covert MW. 2010. A Forward-Genetic  
680 Screen and Dynamic Analysis of Lambda Phage Host-Dependencies Reveals an Extensive  
681 Interaction Network and a New Anti-Viral Strategy ed. I. Matic. *PLoS Genet* **6**: e1001017.
- 682 Maynard ND, Macklin DN, Kirkegaard K, Covert MW. 2012. Competing pathways control host  
683 resistance to virus via tRNA modification and programmed ribosomal frameshifting. *Mol Syst*  
684 *Biol* **8**: 567.
- 685 Miller ES, Kutter E, Mosig G, Arisaka F, Kunisawa T, Rüger W. 2003. Bacteriophage T4 genome.  
686 *Microbiol Mol Biol Rev* **67**: 86–156, table of contents.
- 687 Morgens DW, Deans RM, Li A, Bassik MC. 2016. Systematic comparison of CRISPR/Cas9 and RNAi  
688 screens for essential genes. *Nat Biotechnol* **34**: 634–636.
- 689 Park RJ, Wang T, Koundakjian D, Hultquist JF, Lamothe-Molina P, Monel B, Schumann K, Yu H,  
690 Krupczak KM, Garcia-Beltran W, et al. 2017. A genome-wide CRISPR screen identifies a  
691 restricted set of HIV host dependency factors. *Nat Genet* **49**: 193–203.
- 692 Paynter MJB, Bungay HR. 1970. Capsular protection against virulent coliphage infection. *Biotechnol*  
693 *Bioeng* **12**: 341–346.
- 694 Peters JM, Colavin A, Shi H, Czarny TL, Larson MH, Wong S, Hawkins JS, Lu CHS, Koo B-M, Marta E, et  
695 al. 2016. A Comprehensive, CRISPR-based Functional Analysis of Essential Genes in Bacteria. *Cell*  
696 **165**: 1493–1506.
- 697 Qi LS, Larson MH, Gilbert LA, Doudna JA, Weissman JS, Arkin AP, Lim WA. 2013. Repurposing CRISPR  
698 as an RNA-Guided Platform for Sequence-Specific Control of Gene Expression. *Cell* **152**: 1173–  
699 1183.
- 700 Qimron U, Marintcheva B, Tabor S, Richardson CC. 2006. Genomewide screens for *Escherichia coli*  
701 genes affecting growth of T7 bacteriophage. *Proc Natl Acad Sci U S A* **103**: 19039–44.
- 702 Randall-Hazelbauer L, Schwartz M. 1973. Isolation of the bacteriophage lambda receptor from  
703 *Escherichia coli*. *J Bacteriol* **116**: 1436–1446.
- 704 Randall LL. 1975. Quantitation of the loss of the bacteriophage lambda receptor protein from the  
705 outer membrane of lipopolysaccharide-deficient strains of *Escherichia coli*. *J Bacteriol* **123**: 41–  
706 6.
- 707 Rendueles O, Garcia-Garcerà M, Néron B, Touchon M, Rocha EPC. 2017. Abundance and co-  
708 occurrence of extracellular capsules increase environmental breadth: Implications for the  
709 emergence of pathogens ed. D.E. Bessen. *PLoS Pathog* **13**: e1006525.
- 710 Schmittgen TD, Livak KJ. 2008. Analyzing real-time PCR data by the comparative CT method. *Nat*  
711 *Protoc* **3**: 1101–1108.
- 712 Scholl D, Adhya S, Merrill C. 2005. *Escherichia coli* K1's capsule is a barrier to bacteriophage T7. *Appl*  
713 *Environ Microbiol* **71**: 4872–4.
- 714 Scholl D, Rogers S, Adhya S, Merrill CR. 2001. Bacteriophage K1-5 encodes two different tail fiber  
715 proteins, allowing it to infect and replicate on both K1 and K5 strains of *Escherichia coli*. *J Virol*  
716 **75**: 2509–15.
- 717 Shalem O, Sanjana NE, Hartenian E, Shi X, Scott DA, Mikkelsen T, Heckl D, Ebert BL, Root DE, Doench  
718 JG, et al. 2014. Genome-scale CRISPR-Cas9 knockout screening in human cells. *Science* **343**: 84–  
719 87.
- 720 St-Pierre F, Cui L, Priest DG, Endy D, Dodd IB, Shearwin KE. 2013. One-step cloning and chromosomal

- 721 integration of DNA. *ACS Synth Biol* **2**: 537–541.
- 722 Sternberg N. 1973a. Properties of a mutant of Escherichia coli defective in bacteriophage lambda  
723 head formation (groE). II. The propagation of phage lambda. *J Mol Biol* **76**: 25–44.
- 724 Sternberg N. 1973b. Properties of a mutant of Escherichia coli defective in bacteriophage  $\lambda$  head  
725 formation (groE). I. Initial characterization. *J Mol Biol* **76**: 1–23.
- 726 Stout V. 1994. Regulation of capsule synthesis includes interactions of the RcsC/RcsB regulatory pair.  
727 *Res Microbiol* **145**: 389–392.
- 728 Thomason MK, Bischler T, Eisenbart SK, Förstner KU, Zhang A, Herbig A, Nieselt K, Sharma CM, Storz  
729 G. 2015. Global transcriptional start site mapping using differential RNA sequencing reveals  
730 novel antisense RNAs in Escherichia coli. *J Bacteriol* **197**: 18–28.
- 731 Vigouroux A, Oldewurtel E, Cui L, Bikard D, Teeffelen S van. 2018. Tuning dCas9's ability to block  
732 transcription enables robust, noiseless knockdown of bacterial genes. *Mol Syst Biol* **14**: e7899–  
733 e7899.
- 734 Wang T, Birsoy K, Hughes NW, Krupczak KM, Post Y, Wei JJ, Lander ES, Sabatini DM. 2015.  
735 Identification and characterization of essential genes in the human genome. *Science (80- )* **350**:  
736 1096–1101.
- 737 Wang T, Wei JJ, Sabatini DM, Lander ES. 2014. Genetic screens in human cells using the CRISPR-Cas9  
738 system. *Science* **343**: 80–4.
- 739 Yamamoto N, Nakahigashi K, Nakamichi T, Yoshino M, Takai Y, Touda Y, Furubayashi A, Kinjyo S, Dose  
740 H, Hasegawa M, et al. 2009. Update on the Keio collection of Escherichia coli single-gene  
741 deletion mutants. *Mol Syst Biol* **5**: 335.
- 742 Yamazaki Y, Niki H, Kato J. 2008. Profiling of Escherichia coli Chromosome Database. In *Methods in*  
743 *molecular biology (Clifton, N.J.)*, Vol. 416 of, pp. 385–389.
- 744 Yochem J, Uchida H, Sunshine M, Saito H, Georgopoulos C, Feiss M. 1978. Genetic Analysis of Two  
745 Genes, dnaJ and dnaK, Necessary for Escherichia coli and Bacteriophage Lambda DNA  
746 Replication. *Mol Gen Genet* **164**: 9–14.
- 747 Yu F, Mizushima S. 1982. Roles of lipopolysaccharide and outer membrane protein OmpC of  
748 Escherichia coli K-12 in the receptor function for bacteriophage T4. *J Bacteriol* **151**: 718–22.
- 749 Zhang R, Miner JJ, Gorman MJ, Rausch K, Ramage H, White JP, Zuiani A, Zhang P, Fernandez E, Zhang  
750 Q, et al. 2016. A CRISPR screen defines a signal peptide processing pathway required by  
751 flaviviruses. *Nature* **535**: 164–168.
- 752 Zhou J, Rudd KE. 2012. EcoGene 3.0. *Nucleic Acids Res* **41**: D613–D624.
- 753
